# Supplementary material for: Soil Nitrogen and Flooding Intensity Determine the Trade-Off between Leaf and Root Traits of Riparian Plant Species
Source: MDPI journal article supplement (doi:10.3390/plants13070978), 2024-03-29
Supplement: s1 [file s1]

## Supplementary Material

Table S1 Leaf and root traits, as well as soil factors measured in this study.

|      | Parameter name                                                | Abridge            |
|------|---------------------------------------------------------------|--------------------|
| Leaf | Specific leaf area (cm <sup>2</sup> /g)                       | SLA                |
|      | Leaf dry matter content (g/g)                                 | DM <sub>leaf</sub> |
|      | Leaf C content (%)                                            | C <sub>leaf</sub>  |
|      | Leaf N content (%)                                            | N <sub>leaf</sub>  |
|      | Leaf Carbon to Nitrogen Ratio                                 | CN <sub>leaf</sub> |
|      | Photosynthetic rate (μmol CO <sub>2</sub> /m <sup>2</sup> /s) | PN                 |
| Root | Root tissue density (g/cm <sup>3</sup> )                      | RTD                |
|      | Root C content (%)                                            | C <sub>root</sub>  |
|      | Root N content (%)                                            | N <sub>root</sub>  |
|      | Root Carbon to Nitrogen Ratio                                 | CN <sub>root</sub> |
| Soil | Potential of hydrogen                                         | pH                 |
|      | Soil C content (%)                                            | C <sub>soil</sub>  |
|      | Soil N content (%)                                            | N <sub>soil</sub>  |
|      | Soil Carbon to Nitrogen Ratio                                 | CN <sub>soil</sub> |
|      | Soil Moisture Content (%)                                     | Humidity           |

Table S2 The mean values of plant traits at community scale, *C.dactylon*, *X.strumarium* and *A.theophrasti* under different flooding intensity.

|           | Flooding intensity (FI)   | N <sub>leaf</sub> (%) | C <sub>leaf</sub> (%) | CN <sub>leaf</sub> | N <sub>root</sub> (%) | C <sub>root</sub> (%) | CN <sub>root</sub> | PN (μmol CO <sub>2</sub> /m <sup>2</sup> /s) | SLA (%) | RTD (%) | N <sub>soil</sub> (%) | C <sub>soil</sub> (%) | CN <sub>soil</sub> | pH   | Humidity |
|-----------|---------------------------|-----------------------|-----------------------|--------------------|-----------------------|-----------------------|--------------------|----------------------------------------------|---------|---------|-----------------------|-----------------------|--------------------|------|----------|
| Community | High flooding intensity   | 2.57                  | 39.46                 | 16.47              | 0.92                  | 37.95                 | 46.39              | 15.08                                        | 6.11    | 13.04   | 0.13                  | 1.95                  | 22.92              | 8.21 | 32.21    |
|           | Medium flooding intensity | 2.93                  | 39.35                 | 14.32              | 0.79                  | 37.31                 | 51.13              | 13.13                                        | 33.78   | 1.45    | 0.10                  | 1.94                  | 18.62              | 8.13 | 29.73    |
|           | Low flooding intensity    | 3.19                  | 40.18                 | 13.52              | 0.64                  | 38.34                 | 73.64              | 30.48                                        | 33.56   | 1.28    | 0.08                  | 2.01                  | 22.48              | 7.72 | 25.83    |

|                             |                           |      |       |       |      |       |       |       |       |      |      |      |       |      |       |
|-----------------------------|---------------------------|------|-------|-------|------|-------|-------|-------|-------|------|------|------|-------|------|-------|
| <i>Cynodon dactylon</i>     | High flooding intensity   | 2.28 | 40.88 | 18.59 | 0.92 | 38.58 | 46.19 | 15.22 | 1.33  | 2.12 | 0.14 | 2.00 | 23.68 | 8.15 | 30.16 |
|                             | Medium flooding intensity | 2.30 | 40.19 | 18.23 | 0.79 | 36.36 | 49.15 | 23.35 | 2.20  | 1.65 | 0.11 | 2.14 | 21.76 | 8.17 | 26.31 |
|                             | Low flooding intensity    | 4.99 | 40.18 | 10.21 | 0.96 | 46.39 | 48.32 | 7.83  | 4.81  | 0.88 | 1.44 | 5.21 | 20.59 | 8.04 | 32.88 |
| <i>Abutilon theophrasti</i> | High flooding intensity   | 4.91 | 39.27 | 8.17  | 0.86 | 37.44 | 47.54 | 6.54  | 79.22 | 1.36 | 0.10 | 1.97 | 19.99 | 8.11 | 28.66 |
|                             | Medium flooding intensity | 3.52 | 38.77 | 11.05 | 0.80 | 39.86 | 52.36 | 1.58  | 74.82 | 3.98 | 0.13 | 2.31 | 18.11 | 8.24 | 26.78 |
| <i>Xanthium strumarium</i>  | Medium flooding intensity | 3.46 | 38.36 | 11.19 | 0.84 | 39.00 | 52.60 | 8.96  | 64.72 | 0.84 | 2.09 | 0.17 | 17.85 | 8.22 | 31.51 |
|                             | Low flooding intensity    | 4.27 | 39.96 | 9.36  | 1.64 | 46.29 | 28.22 | 2.15  | 46.71 | 3.08 | 1.11 | 3.37 | 3.03  | 8.60 | 37.39 |
